# Supplementary material
Source: publisher figshare collection journal article supplement (https://acs.figshare.com/ndownloader/files/17618360)
Supplement: Supplementary file 1 [file 17618360]

*Supporting Information*

Poly lactide-based Chiral Porous Monolithic Materials Prepared  
Using High Internal Phase Emulsion Template Method for  
Enantioselective Release

*Xueyong Yong,<sup>abc</sup> Qisong Hu,<sup>c</sup> Ergang Zhou,<sup>c</sup> Jianping Deng,<sup>\*bc</sup> and Youping Wu<sup>\*ac</sup>*

<sup>a</sup>State Key Laboratory of Organic-Inorganic Composites, <sup>b</sup>State Key Laboratory of Chemical Resource Engineering, and <sup>c</sup>College of Materials Science and Engineering, Beijing University of Chemical Technology, Beisanhuan East Road 15#, Beijing 100029, China.

\*E-mail: dengjp@mail.buct.edu.cn (Deng); wuyp@mail.buct.edu.cn (Wu).

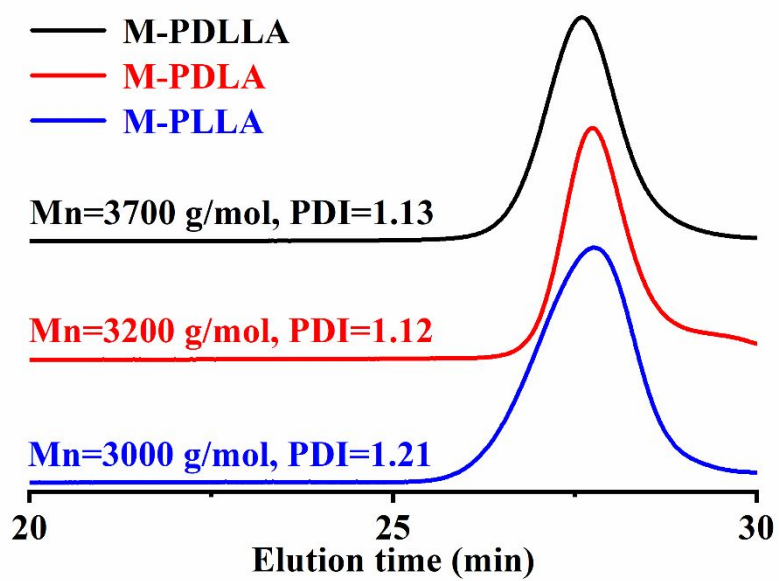

**Figure S1.** GPC traces of M-PLLA, M-PDLA and M-PDLLA.

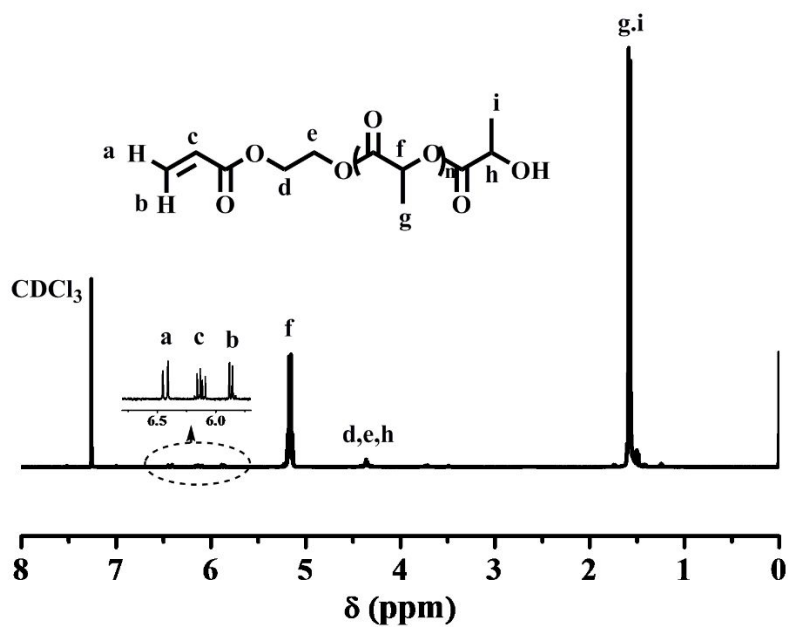

**Figure S2.** <sup>1</sup>H NMR of M-PLLA.

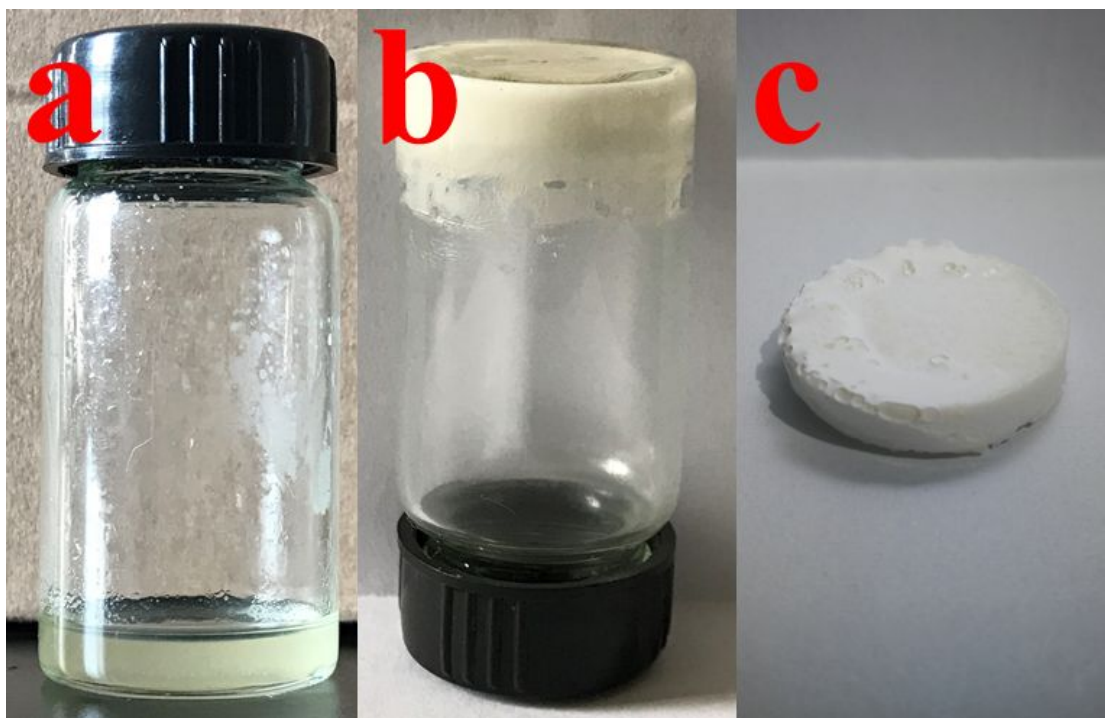

**Figure S3.** typical photographs of forming PLLA-based polyHIPE, continuous phase solution (a), HIPE (b) and PLLA-based polyHIPE (c).

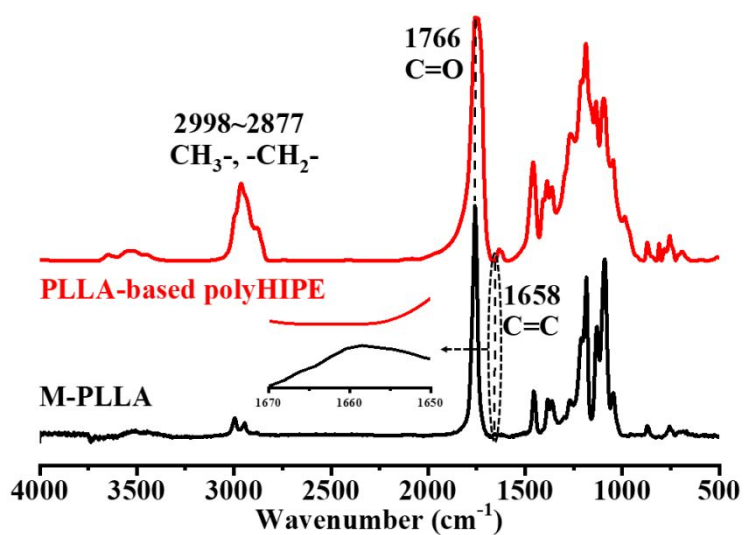

**Figure S4.** Typical FT-IR spectra of M-PLLA and PLLA-based polyHIPE.

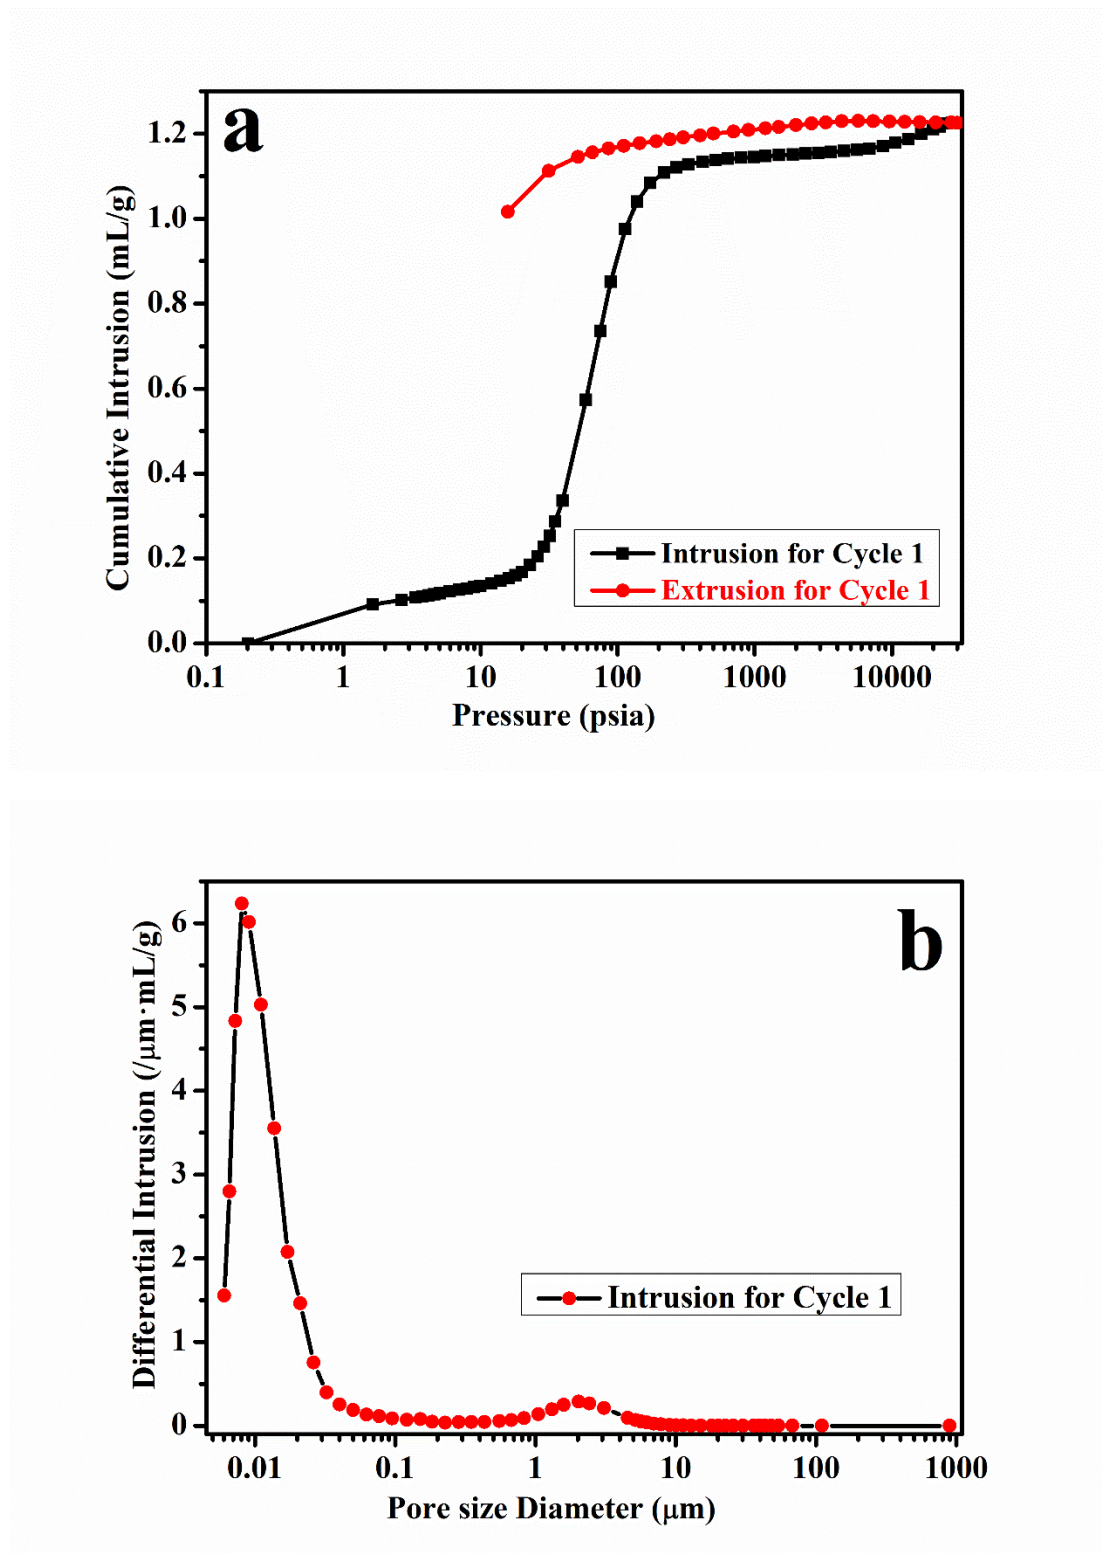

**Figure S5.** Mercury adsorption/desorption isotherms (a) and pore size distribution (b) of PLLA-based polyHIPE.

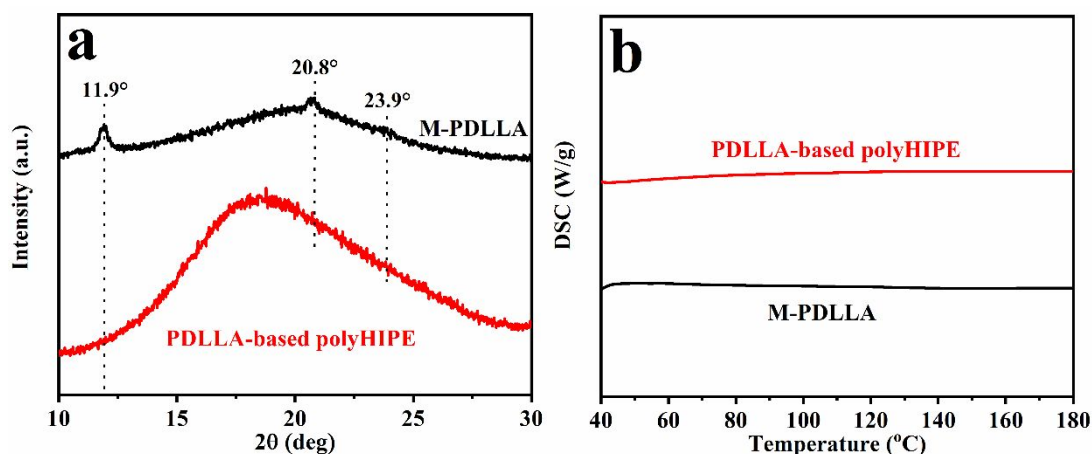

**Figure S6.** XRD patterns (a) and DSC curves (b) of M-PDLLA and PDLLA-based polyHIPE.

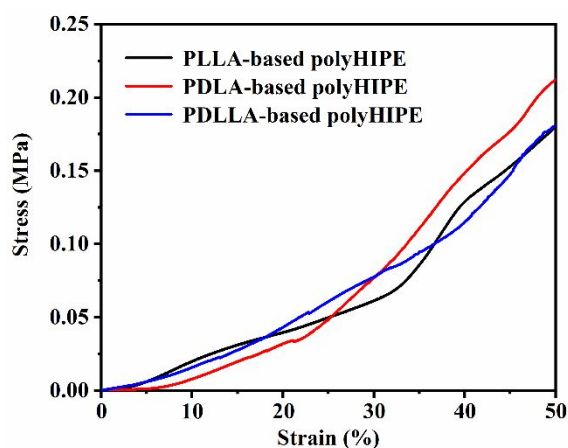

**Figure S7.** Compressive stress-strain curve of PLLA-based polyHIPE, PDLA-based polyHIPE and PDLLA-based polyHIPE.

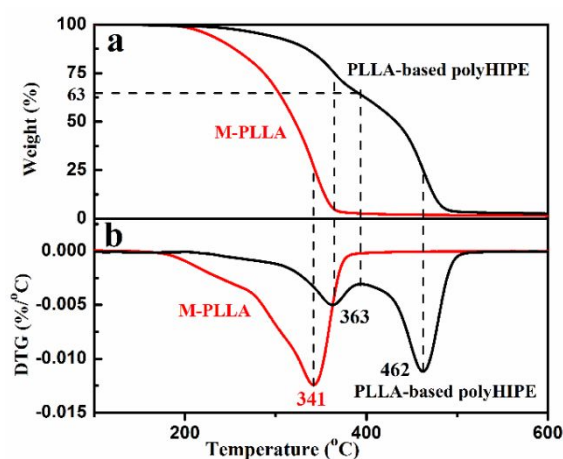

**Figure S8.** (a) TGA and (b) DTG curves of PLLA and PLLA-based polyHIPE. The test was measured at a scanning rate of 10 °C/min in N<sub>2</sub>.

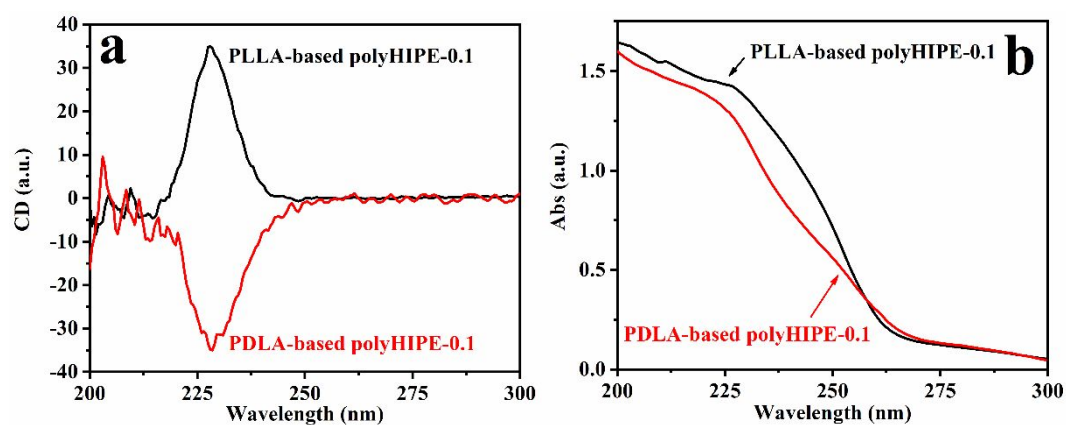

**Figure S9.** (a) CD and (b) UV-vis spectra of PLLA-based polyHIPE-0.1 and PDLA-based polyHIPE-0.1.

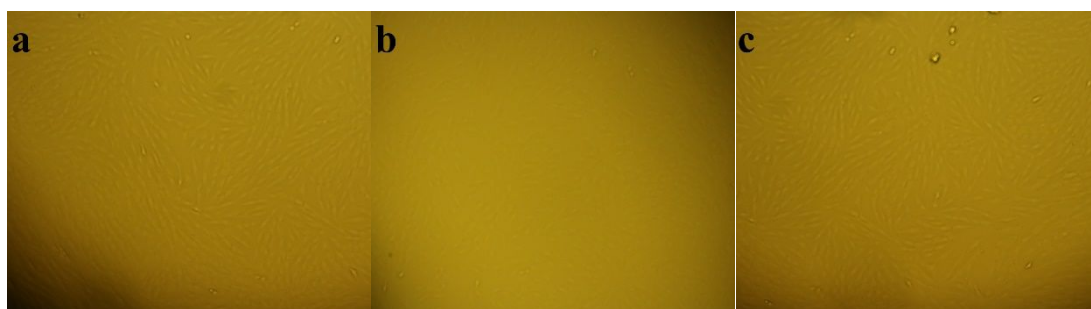

**Figure S10.** Photomicrographs of MC3T3-E1 cells cultured for 3 days using (a) PLLA-, (b) PDLA- and (c) PDLLA-based polyHIPE.

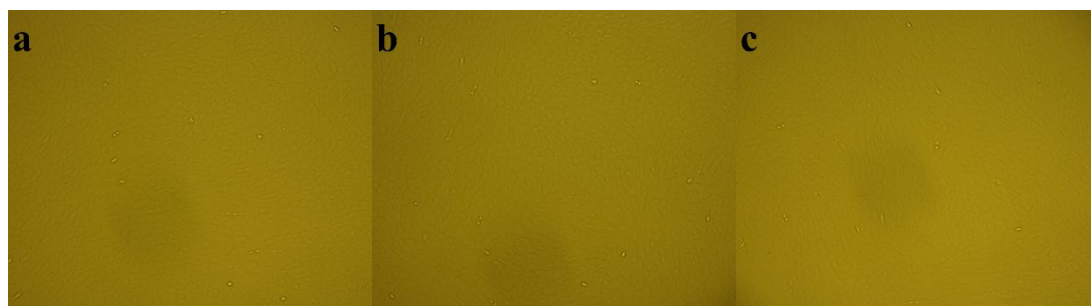

**Figure S11.** Photomicrographs of MC3T3-E1 cells cultured for 7 days using (a) PLLA-, (b) PDLA- and (c) PDLLA-based polyHIPE.

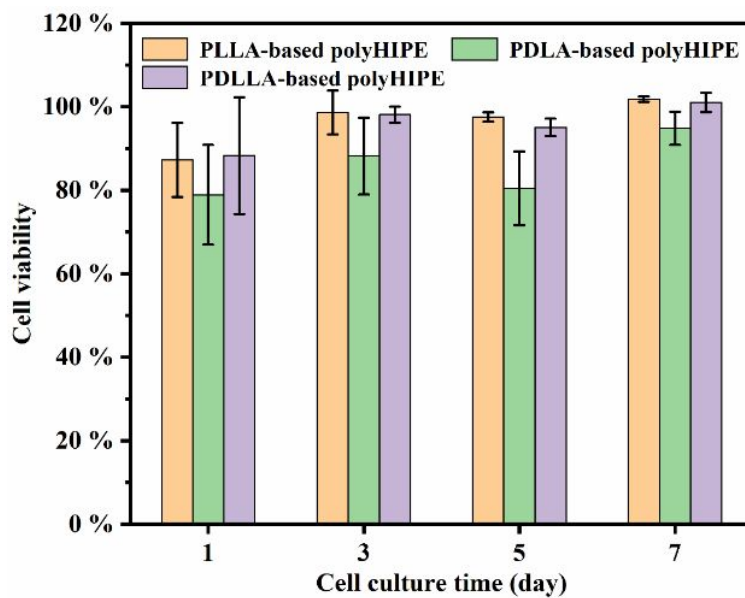

**Figure S12.** Cell viability of MC3T3-E1 cells for 1, 3, 5 and 7 days with PLLA-, PDLA and PDLLA-based polyHIPE, tested using CCK-8 assay. (Error bars designate means  $\pm$ SD for n = 6)

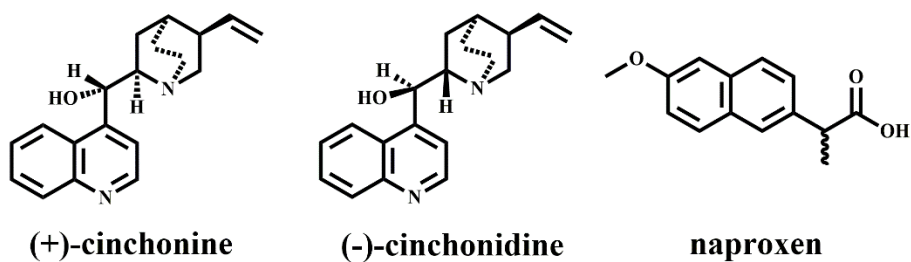

**Figure S13.** The chemical structure of (+)-cinchonine, (-)-cinchonidine and naproxen.



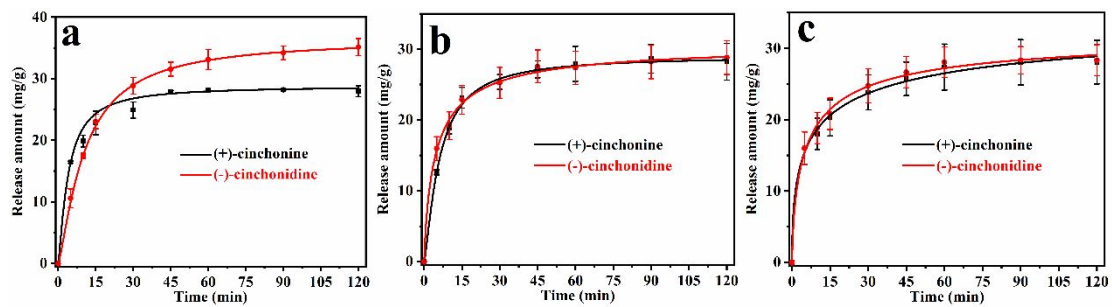

**Figure S14.** Time-release amount curves of (+)-cinchonine/(-)-cinchonidine from (a) PLLA-based polyHIPE, (b) PDLA-based polyHIPE and (c) PDLLA-based polyHIPE.

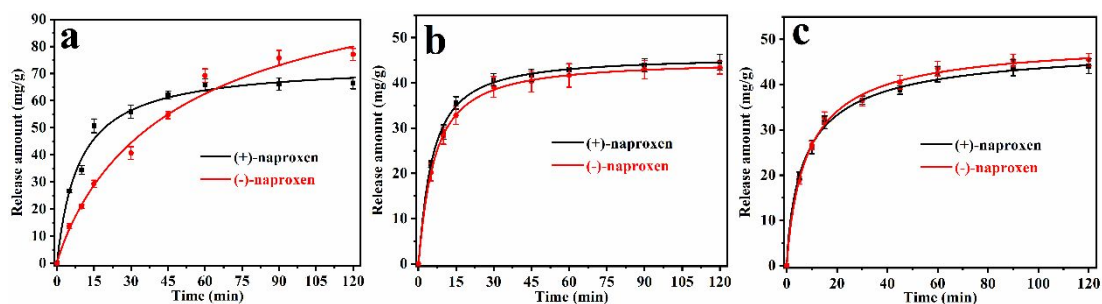

**Figure S15.** Time-release curves of (+)/(-)-naproxen from (a) PLLA-based polyHIPE, (b) PDLA-based polyHIPE and (c) PDLLA-based polyHIPE.
